# Supplementary material for: Discovering the Biological Target of 5-epi-Sinuleptolide Using a Combination of Proteomic Approaches
Source: MDPI journal article supplement (doi:10.3390/md15100312), 2017-10-13
Supplement: s1 [file s1]

# Discovering the biological target of 5-epi-Sinuleptolide using a combination of proteomic approaches.

Elva Morretta<sup>1,2</sup>, Roberta Esposito<sup>1</sup>, Carmen Festa<sup>3</sup>, Raffaele Riccio<sup>1,\*</sup>, Agostino Casapullo<sup>1</sup> and Maria Chiara Monti<sup>1,\*</sup>

<sup>1</sup> Department of Pharmacy, University of Salerno, Via Giovanni Paolo II 132, 84084, Fisciano, Salerno, Italy; emorretta@unisa.it, roesposito@unisa.it, riccio@unisa.it, casapullo@unisa.it, mcmonti@unisa.it

<sup>2</sup> PhD Program in Drug Discovery and Development; University of Salerno, Via Giovanni Paolo II 132, 84084, Fisciano, Salerno, Italy;

<sup>3</sup> Department of Pharmacy, University of Naples "Federico II", Naples, Italy; carmen.festa@unina.it

\* Correspondence: riccio@unisa.it, mcmonti@unisa.it; tel.: 0039-089-969754

## Chemical modification of 5-epi-SNEP by glycidol and evaluation of its biological activity:

Generally when a molecule is functionalized for a pull-down experiment, it's valuable to verify if the chemical modification impacts on compound activity. Thus, we moved to check if 5-epi-SNEP modification by an epoxide containing molecule, such as glycidol, affected its cellular toxicity versus HeLa cells. To this aim, 1 mg of 5-epi-SNEP was incubated with glycidol (Figure S1A, glycidol excess of 250 X over 5-epi-SNEP (w:w)) for 1 h at 37°C in ACN-50 mM NaHCO<sub>3</sub> 1% triethyl-amine and the products were purified by HPLC on a C18 column (Luna Omega 5µm Polar C18 150× 2.1mm, Phenomenex, Torrance, CA) at a flow rate of 0.2 ml/min. Elution was achieved by means of a linear gradient of B from 10 to 95% over 20 min (solution A: H<sub>2</sub>O and trifluoroacetic acid 0.1%; solution B: 95% CH<sub>3</sub>CN, 5% H<sub>2</sub>O and trifluoroacetic acid 0.07%). The compound mixture **1A** and **1B** in their mono-sodiated forms (Figure S1A) has been characterized by HRMS and HRMSMS analysis on an Orbitrap LTQ XL (Thermo-Scientific) giving a single m/z ion at 427.1722 u.m.a (chemical formula in Fig. S1B). As shown in Figure S1B, compound **1** was not detected by HRMS analysis since it easily dehydrated giving a mixture of products, well characterized by HR-MSMS analysis. Indeed, as reported in Figure S1C, there are fragments compatible with: the loss of one molecule of H<sub>2</sub>O from compound **1B** (m/z 409.1755 u.m.a) or the loss of one molecule of CO from compound **1A** (m/z 399.1773 u.m.a) pointing that only compounds **1A** and **1B** were formed. Moreover, the m/z fragments at 371.1462 u.m.a and 353.1357 u.m.a, compatible with the loss of the glycidol-derived side chain, confirmed the mechanism postulated in Figure S1A. The obtained mixture was submitted to MTT assays (as reported in paragraph 4.4) and the results are showed in Fig.S2. The histograms clearly demonstrated that there is no HeLa cells cito-toxicity alteration if compared with the native unaltered 5-epi-SNEP molecule.

Scheme of 5-*epi*-SNEP modification by glycidol and tandem MS analysis of the reaction products.

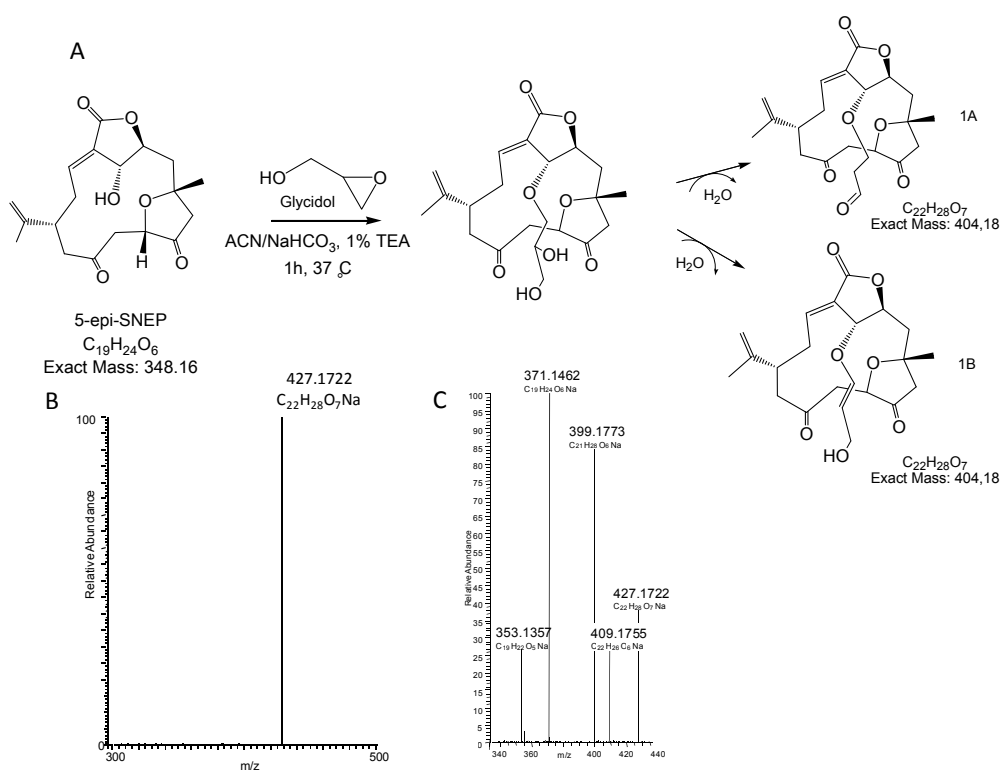

**Figure S1:** Panel A shows the postulated mechanism of 5-*epi*-SNEP modification by glycidol followed by dehydration. Panel B and C show the HRMS analysis of the reaction products and their HRMSMS spectra together with the chemical formulas.

Cell viability of HeLa cells treated by 5-*epi*-SNEP or by its derivatives.

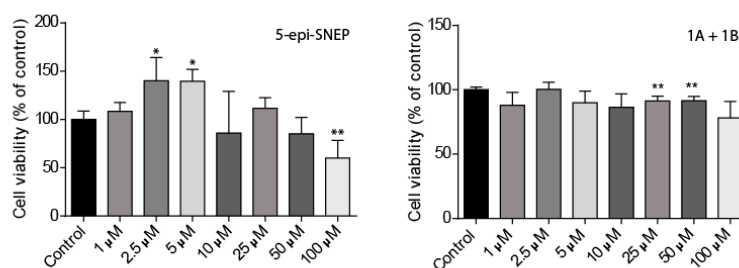

**Figure S2:** Cell viability assay of HeLa cells treated with 5-*epi*-SNEP (left panel) or compounds mixture 1A and 1B (right panel) for 24 h at reported concentrations. Histograms were the result of four independent experiments and the cell viability of control was put as 100%.

List of 5-epi-SNEP partners found in HeLa cell lysate.

**Table S1:** For each protein, the following parameters are reported: Mascot score (Score), molecular weight (mass), number of matched peptides (Matches) and unique peptides used in the identification process (Match(sig)), number of sequences (Sequences) and the number of significant distinct sequence matches in the protein identification process (Seq(sig)). All the proteins with a Mascot Score less than 60 and identified with less than 5 Match(sig) were removed.

| Accession   | Score | Mass   | Matches | Match(sig) | Sequences | Seq(sig) | Description                                         |
|-------------|-------|--------|---------|------------|-----------|----------|-----------------------------------------------------|
| ACTG_HUMAN  | 28445 | 42.108 | 849     | 743        | 22        | 20       | Actin, cytoplasmic 2                                |
| ACTB_HUMAN  | 11533 | 42.052 | 407     | 291        | 10        | 6        | Actin, cytoplasmic 1                                |
| ACTC_HUMAN  | 3682  | 42.334 | 323     | 136        | 7         | 4        | Actin, alpha cardiac muscle 1                       |
| ACTBL_HUMAN | 1697  | 42.318 | 104     | 67         | 6         | 5        | Beta-actin-like protein 2                           |
| TBB4B_HUMAN | 1623  | 50.255 | 73      | 63         | 17        | 15       | Tubulin beta-4B chain                               |
| TBA1C_HUMAN | 1118  | 50.548 | 53      | 39         | 10        | 10       | Tubulin alpha-1C chain                              |
| 1433E_HUMAN | 1064  | 29.326 | 29      | 26         | 8         | 6        | 14-3-3 protein epsilon                              |
| ANXA1_HUMAN | 996   | 38.918 | 28      | 26         | 9         | 8        | Annexin A1                                          |
| VDAC1_HUMAN | 768   | 30.868 | 27      | 23         | 8         | 6        | Voltage-dependent anion-selective channel protein 1 |
| LDHB_HUMAN  | 693   | 36.900 | 32      | 28         | 5         | 3        | L-lactate dehydrogenase B chain                     |
| EF2_HUMAN   | 685   | 96.246 | 37      | 25         | 16        | 10       | Elongation factor 2                                 |
| CAZA1_HUMAN | 604   | 33.073 | 28      | 25         | 5         | 4        | F-actin-capping protein subunit alpha-1             |
| 1433Z_HUMAN | 518   | 27.899 | 22      | 21         | 5         | 5        | 14-3-3 protein zeta/delta                           |
| TERA_HUMAN  | 456   | 89.950 | 22      | 16         | 10        | 7        | Transitional endoplasmic reticulum ATPase           |
| ARF1_HUMAN  | 431   | 20.741 | 11      | 9          | 5         | 4        | ADP-ribosylation factor 1                           |
| TPM3_HUMAN  | 405   | 32.987 | 28      | 17         | 6         | 5        | Tropomyosin alpha-3 chain                           |
| PSA7_HUMAN  | 302   | 28.041 | 7       | 6          | 4         | 3        | Proteasome subunit alpha type-7                     |
| COF2_HUMAN  | 297   | 18.839 | 19      | 13         | 3         | 3        | Cofilin-2                                           |
| PGAM1_HUMAN | 287   | 28.900 | 20      | 10         | 5         | 4        | Phosphoglycerate mutase 1                           |
| RAN_HUMAN   | 273   | 24.579 | 9       | 8          | 2         | 2        | GTP-binding nuclear protein Ran                     |
| ARF4_HUMAN  | 255   | 20.612 | 6       | 5          | 3         | 2        | ADP-ribosylation factor 4                           |
| VDAC3_HUMAN | 244   | 30.981 | 44      | 18         | 5         | 4        | Voltage-dependent anion-selective channel protein 3 |
| ADT3_HUMAN  | 242   | 33.073 | 13      | 12         | 3         | 3        | ADP/ATP translocase 3                               |
| TBB6_HUMAN  | 226   | 50.281 | 12      | 9          | 6         | 4        | Tubulin beta-6 chain                                |
| VDAC2_HUMAN | 220   | 32.060 | 10      | 7          | 3         | 3        | Voltage-dependent anion-selective channel protein 2 |
| PRDX4_HUMAN | 213   | 30.749 | 12      | 10         | 3         | 3        | Peroxiredoxin-4                                     |
| PPIB_HUMAN  | 180   | 23.785 | 16      | 8          | 4         | 3        | Peptidyl-prolyl cis-trans isomerase B               |
| ANXA5_HUMAN | 177   | 35.971 | 17      | 13         | 7         | 5        | Annexin A5                                          |
| 1433T_HUMAN | 175   | 28.032 | 9       | 8          | 3         | 3        | 14-3-3 protein theta                                |
| IF4A1_HUMAN | 174   | 46.353 | 8       | 7          | 4         | 4        | Eukaryotic initiation factor 4A-I                   |
| DEST_HUMAN  | 162   | 18.950 | 9       | 6          | 3         | 2        | Dextrin                                             |
| PRDX6_HUMAN | 145   | 25.133 | 8       | 5          | 5         | 4        | Peroxiredoxin-6                                     |
| PCNA_HUMAN  | 145   | 29.092 | 9       | 5          | 5         | 3        | Proliferating cell nuclear antigen                  |
| RS10_HUMAN  | 116   | 18.886 | 13      | 10         | 3         | 2        | 40S ribosomal protein S10                           |
| RS18_HUMAN  | 98    | 17.708 | 6       | 5          | 2         | 2        | 40S ribosomal protein S18                           |
| APT_HUMAN   | 90    | 19.766 | 7       | 6          | 2         | 2        | Adenine phosphoribosyltransferase                   |
| RANG_HUMAN  | 86    | 23.467 | 5       | 5          | 3         | 3        | Ran-specific GTPase-activating protein              |

Actin identification by tandem MS experiments in three samples of HeLa cell lysate treated or not with 5-epi-SNEP and subtilisin

**Table S2:** The following parameters are reported for each identification: Mascot score (Score), number of matched peptides (Matches) and the relative quantization of actin (emPAI). The so-called exponentially modified protein abundance index (emPAI) was based on the number of observed peptides per protein normalized by the theoretical number of protein theoretical peptides. [1] If 1 mg of HeLa cell lysate is not treated with 5-epi-SNEP and it is digested by subtilisin (DMSO+subtilisin), actin is identified with low score, few matches and low emPAI, clear indication of its susceptibility to proteases. When 1 mg of HeLa cell lysate is treated with 20 ng of 5-epi-SNEP and it is digested by subtilisin (5-epi-SNEP+subtilisin), actin is identified with higher score, many matches and high emPAI, as expected for a 5-epi-SNEP-mediated protection to protease action. The last column reports the identification of actin in absence of subtilisin and 5-epi-SNEP as it is in the HeLa cell lysate.

| Description                       | DMSO + Subtilisin |         |       | 5-epi-SNEP + Subtilisin |         |       | DMSO -Subtilisin |         |       |
|-----------------------------------|-------------------|---------|-------|-------------------------|---------|-------|------------------|---------|-------|
|                                   | Score             | Matches | emPAI | Score                   | Matches | emPAI | Score            | Matches | emPAI |
| Actin, cytoplasmic 1 Homo sapiens | 50                | 16      | 0.28  | 1986                    | 117     | 4.11  | 4146             | 240     | 7.45  |

Analysis of HeLa cell cycle in presence and in absence of 5-epi-SNEP and Cytochalasin D

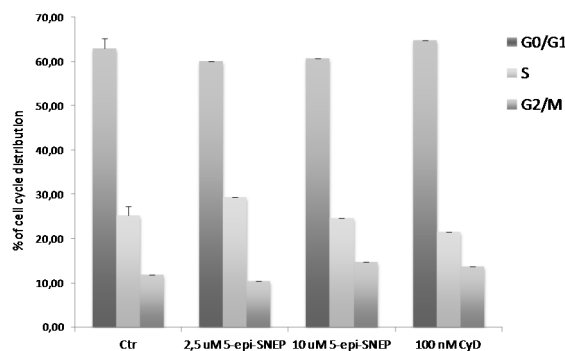

**Figure S3:** Cells were treated with the reported concentrations of 5-epi-SNEP and CyD for 24 hours. Cell cycle was evaluated by flow cytometry. The percentage of cell distribution in each phase was measured by ModFit LT software program ( $G_1$ , S, and  $G_2$ ). Data are mean of four independent experiments  $\pm$  S.D.

#### References:

1. Shinoda, K.; Tomita, M.; Ishihama, Y.; emPAI Calc—for the estimation of protein abundance from large-scale identification data by liquid chromatography-tandem mass spectrometry *Bioinformatics*, **2010**, *26*, 576–577 doi:10.1093/bioinformatics/btp700.
